# Supplementary material for: An efficient and durable hierarchically porous KLA/TiPO catalyst for vapor phase condensation of lactic acid to 2,3-pentanedione
Source: Royal Society of Chemistry journal article supplement (doi:10.1039/c9nj00267g), 2019-01-01
Supplement: c9nj00267g1.pdf [file c9nj00267g1.pdf]

## **An efficient and durable catalyst of hierarchically porous KLA/TiPO for vapor phase condensation of lactic acid to 2,3-pentanedione**

Ju Zhang,<sup>a,b†</sup> Xinli Li,<sup>a†</sup> Jun pang,<sup>a,b</sup> Weixin Zou,<sup>c</sup> Congming Tang,<sup>\*a</sup> and Lin Dong<sup>c</sup>

(<sup>a</sup>School of Chemistry and Chemical Engineering, Chongqing University of Technology, Chongqing 400054, PR China; <sup>b</sup>Chemical Synthesis and Pollution Control Key Laboratory of Sichuan Province, China West Normal University, Nanchong, Sichuan, 637002, PR China; <sup>c</sup>Jiangsu Key Laboratory of Vehicle Emissions Control, Center of Modern Analysis, Nanjing University, Nanjing 210093, PR China)

### **Catalyst characterization**

Powder X-ray diffraction (XRD) measurement was conducted on a Dmax/Ultima IV diffractometer operated at 40 kV and 20 mA with Cu-K $\alpha$  radiation. The FTIR spectra of the catalysts were recorded in the range of 500-4000 cm<sup>-1</sup> on a Nicolet 6700 spectrometer. The specific surface areas of catalysts were measured through nitrogen adsorption at 77 K using TriStar II 3020 instrument. Prior to adsorption, the samples were treated at 250 °C under vacuum for 6 h and the specific surface area was calculated according to the Brunauer-Emmett-Teller (BET) method. Surface acid and base properties of the samples were estimated by NH<sub>3</sub>-TPD and CO<sub>2</sub>-TPD, respectively, on a Finesorb-3010 Instrument. The sample (ca. 50-60 mg) was purged with dry Ar (50 mL/min, purity > 99.999 v/v%) at 300 °C for 1.0 h, followed by reducing the furnace temperature to room temperature, and switching to a flow of 8 v/v% NH<sub>3</sub>/He or 10 v/v% CO<sub>2</sub>/He for 1 h to execute NH<sub>3</sub> or CO<sub>2</sub> adsorption. Next, the samples were swept by dry Ar (50 mL/min, purity > 99.999 v/v%) at 80 °C for 1.0 h to remove the dissociative NH<sub>3</sub> or CO<sub>2</sub> on the surface of

---

\* Corresponding author. Tel.: +86 23 62563250

E-mail address: tcmtang2001@163.com (C. M. Tang).

† Both authors contributed equally to this work.

samples. Then,  $\text{NH}_3$  or  $\text{CO}_2$  chemically adsorbed on the sample is desorbed in the range of 80-650°C at a rate of 10 °C/min.

### Activity evaluation

The condensation of lactic acid to 2,3-pentanedione over the catalysts was carried out in a vertical fixed-bed quartz tubular reactor with a 4 mm inner diameter operated at atmospheric pressure. The catalyst (ca. 0.30-0.40 g, 20-40 meshes) was placed in the middle of the reactor and quartz wool was placed in both ends. Firstly, the catalyst was pretreated at the required reaction temperature (ca. 270 °C) for 1.0 h under  $\text{N}_2$  with high purity (0.1 MPa, 1.2 mL/min). The feedstock (20 wt% aqueous solution of LA) was then pumped into the reactor (LA aqueous solution flow rate, 1.0 mL/h) and driven through the catalyst bed by nitrogen. The liquid products were condensed using ice-water bath and analyzed offline using SP-6890 gas chromatograph (GC) with a FFAP capillary column connected to a FID. Quantitative analysis of the products was carried out by the internal standard method using isopropanol as the internal standard material. GC-MS analyses of the samples were performed using Agilent 5973N Mass Selective Detector attachment. The reaction tail gas was analyzed online using GC with a packed column of TDX-01 connected to TCD detector. The conversion of LA and the selectivity toward 2,3-pentanedione or other by-products were calculated according to equations (1) and (2).

$$\text{Conversion} / \% = \frac{n_0 - n_1}{n_0} \times 100 \text{----- (1)}, \quad \text{Selectivity} / \% = \frac{n_p}{n_0 - n_1} \times 100 \text{----- (2)}$$

Where  $n_0$  is the molar quantity of LA fed into reactor,  $n_1$  is the molar quantity of LA in the effluent, and  $n_p$  is the molar quantity of lactic acid converted to 2,3-pentanedione or other byproducts such as acetaldehyde, propionic acid, acrylic acid, and acetic acid.

According to previous references<sup>1, 2</sup>, LA consumption rate and 2,3-PD formation rate are defined as follows with equations (3) and (4).

$$\text{LA consumption rate} = \frac{\text{amount of LA consumed per hour in the reactor (mmol/h)}}{\text{surface area of catalyst in the reactor (m}^2\text{)}} \text{----- (3)}$$

$$\text{2, 3 - PD formation rate} = \frac{\text{amount of 2,3-PD formed per hour in the reactor (mmol/h)}}{\text{surface area of catalyst in the reactor (m}^2\text{)}} \text{----- (4)}$$

## Tables

Table S1 NH<sub>3</sub>(CO<sub>2</sub>)-TPD of catalysts

| Samples                                         | Peak area CO <sub>2</sub> -TPD(x10 <sup>5</sup> ) | Peak area NH <sub>3</sub> -TPD(x10 <sup>5</sup> ) |
|-------------------------------------------------|---------------------------------------------------|---------------------------------------------------|
| 6:1                                             | 1.39                                              | 1.17                                              |
| 5:1                                             | 1.49                                              | 1.30                                              |
| 4:1                                             | 1.56                                              | 1.30                                              |
| 3:1                                             | 1.42                                              | 1.37                                              |
| 2:1                                             | 1.38                                              | 1.28                                              |
| 1:1                                             | 1.05                                              | 1.19                                              |
| 1:0.5                                           | 0.46                                              | 0.49                                              |
| Ti <sub>3</sub> (PO <sub>4</sub> ) <sub>4</sub> | --                                                | --                                                |

Table S2 Effect of LA concentration

| LA Concentration(wt%) | LA Conv. (%) | Sel.(%) |     |      |     |      |
|-----------------------|--------------|---------|-----|------|-----|------|
|                       |              | 2,3-PD  | AD  | PA   | AC  | AA   |
| 10                    | 82.3         | 58.0    | 5.2 | 12.1 | 5.8 | 18.1 |
| 20                    | 85.7         | 69.0    | 3.9 | 13.1 | 2.2 | 11.1 |
| 30                    | 86.3         | 77.2    | 3.3 | 9.2  | 1.4 | 6.1  |
| 40                    | 88.9         | 79.8    | 3.1 | 10.1 | 1.1 | 4.7  |
| 50                    | 71.2         | 81.4    | 1.7 | 10.1 | 1.5 | 4.2  |
| 60                    | 65.7         | 83.6    | 1.5 | 7.2  | 1.5 | 4.1  |

a: KNO<sub>3</sub>/TiPO catalyst with KNO<sub>3</sub> : TiPO = 4:1, 0.38 mL, 0.30 g; particle size: 20-40 meshes; carrier gas N<sub>2</sub>: 1.2 mL/min; LA feed flow rate: 1.0 g/h; reaction temp.: 270°C; TOS: 7-8 h. b: LA: lactic acid, 2,3-PD: 2,3-pentanedione, AD: acetaldehyde, AC: acetic acid, PA: propionic acid, AA: acrylic acid. c: Mass balance > 90%.

**Table S3 Effect of reaction temperature**

| Reaction temp.(°C) | LA (%) | Conv. | Sel.(%) |     |     |      |      |
|--------------------|--------|-------|---------|-----|-----|------|------|
|                    |        |       | 2,3-PD  | AD  | AC  | PA   | AA   |
| 250                | 65.5   |       | 75.4    | 2.9 | 2.1 | 7.1  | 7.0  |
| 260                | 80.2   |       | 74.8    | 3.7 | 1.1 | 8.2  | 7.5  |
| 270                | 87.5   |       | 72.7    | 3.8 | 1.8 | 10.2 | 11.1 |
| 280                | 90.7   |       | 70.7    | 3.9 | 1.4 | 12.8 | 10.6 |

a: KNO<sub>3</sub>/TiPO catalyst with KNO<sub>3</sub> : TiPO = 5:1, 0.38 mL, 0.30 g; particle size: 20-40 meshes; carrier gas N<sub>2</sub>: 1.2 mL/min; LA feedstock: 20 wt% in water, LA feed flow rate: 1.0 g/h; TOS: 7-8 h. b: LA: lactic acid, 2,3-PD: 2,3-pentanedione, AD: acetaldehyde, AC: acetic acid, PA: propionic acid, AA: acrylic acid.

**Table S4 BET data of samples**

| Sample                 | S <sub>BET</sub> (m <sup>2</sup> /g) | Vol (cm <sup>3</sup> /g) | Pore size* (nm) |
|------------------------|--------------------------------------|--------------------------|-----------------|
| TiPO                   | 43.9                                 | 1.7×10 <sup>-1</sup>     | 15.9            |
| KNO <sub>3</sub> /TiPO | 5.3                                  | 3.7×10 <sup>-2</sup>     | 28.4            |

\*: calculated from desorption branch data on the Barrett-Joyner-Halenda (BJH) model.

F

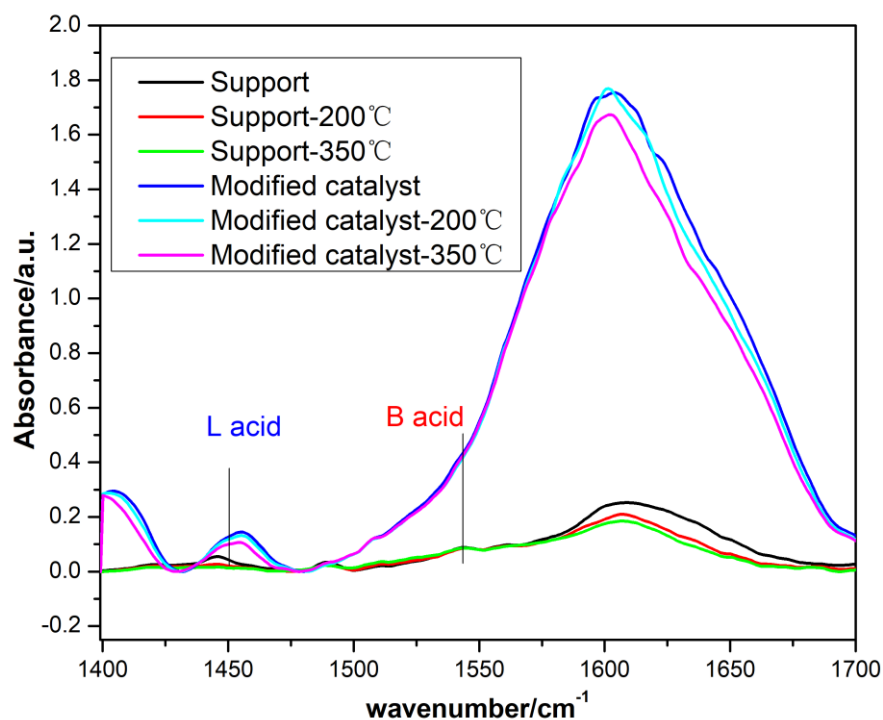

| Sample             | 200°C (desorption temp.)   |                            | 350°C (desorption temp.)   |                            |
|--------------------|----------------------------|----------------------------|----------------------------|----------------------------|
|                    | B acidic sites<br>(mmol/g) | L acidic sites<br>(mmol/g) | B acidic sites<br>(mmol/g) | L acidic sites<br>(mmol/g) |
| Support            | 0.01438                    | 0.00666                    | 0.01311                    | 0.00126                    |
| Modified catalyst* | 0.00000                    | 0.04080                    | 0.00000                    | 0.02690                    |

Figure S1 IR-Py of samples (\*: KNO<sub>3</sub> : TPO=4:1, by weight)

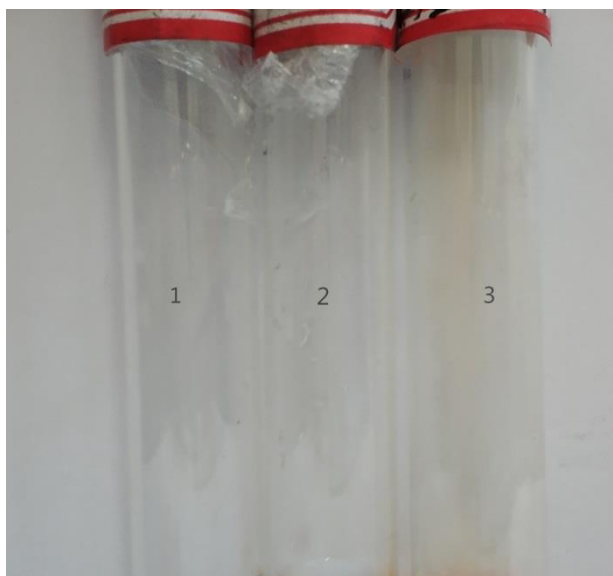

**Figure S2** Observation of tail gas colour in three sets of experiments using  $\text{KNO}_3/\text{TiPO}$  catalyst ( $\text{KNO}_3 : \text{TiPO} = 4:1$ )

a:  $\text{KNO}_3/\text{TiPO}$  catalyst with  $\text{KNO}_3 : \text{TiPO} = 4:1$ , 0.38 mL, 0.30 g; particle size: 20-40 meshes, reaction temp.:  $270^\circ\text{C}$ . **No.1**, without LA and pure water, feeding only carrier gas, **No.2**, feeding with pure water as well as carrier gas and **No.3**, feeding LA aqueous solution as well as carrier gas.

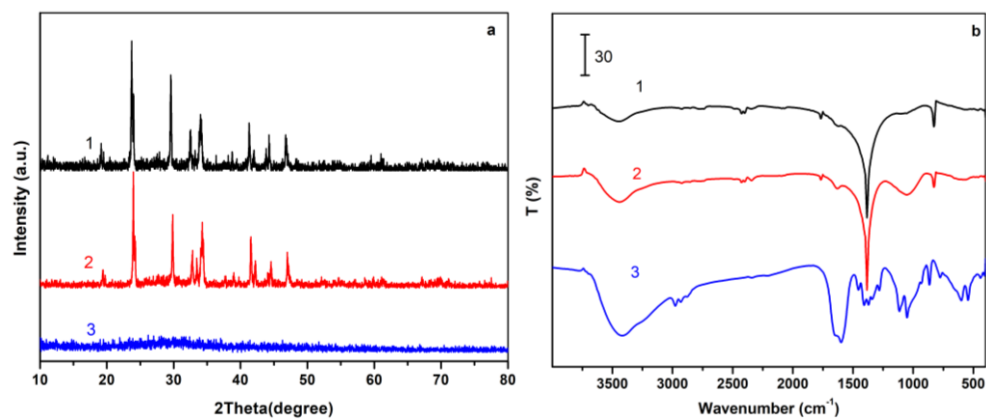

**Figure S3** XRD (a) and FT-IR (b) of  $\text{KNO}_3/\text{TiPO}$  catalyst ( $\text{KNO}_3 : \text{TiPO} = 4:1$ ) experienced through three sets of experiments

a:  $\text{KNO}_3/\text{TiPO}$  catalyst with  $\text{KNO}_3 : \text{TiPO} = 4:1$ , 0.38 mL, 0.30 g; particle size: 20-40 meshes, reaction temp.:  $270^\circ\text{C}$ . **No.1**, without LA and pure water, feeding only carrier gas, **No.2**, feeding with pure water as well as carrier gas and **No.3**, feeding LA aqueous solution as well as carrier gas.

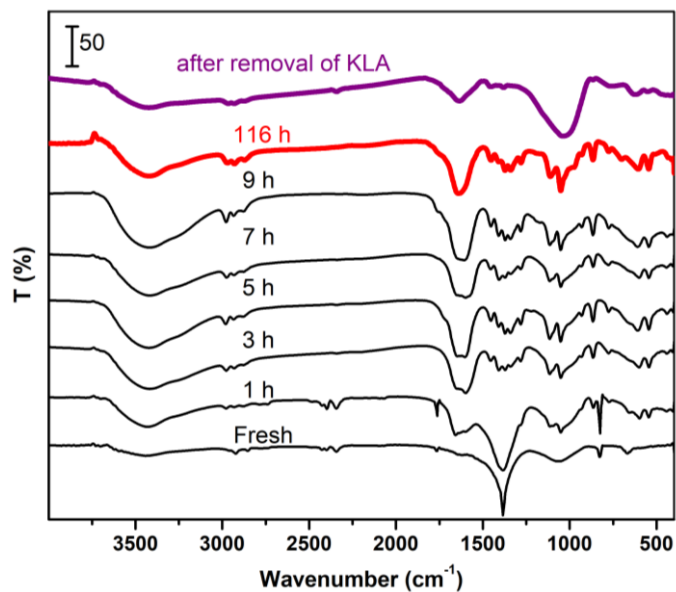

**Figure S4** FT-IR spectra of  $\text{KNO}_3/\text{TiPO}$  catalyst ( $\text{KNO}_3 : \text{TiPO} = 4:1$ ) and its corresponding sample by removal of active species

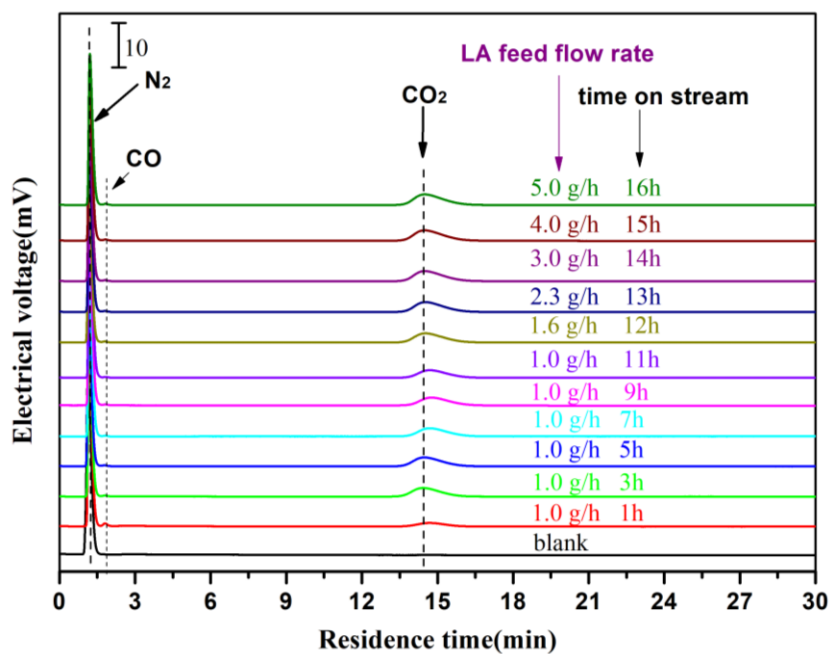

**Figure S5** Tail gas analysis with time on stream using GC

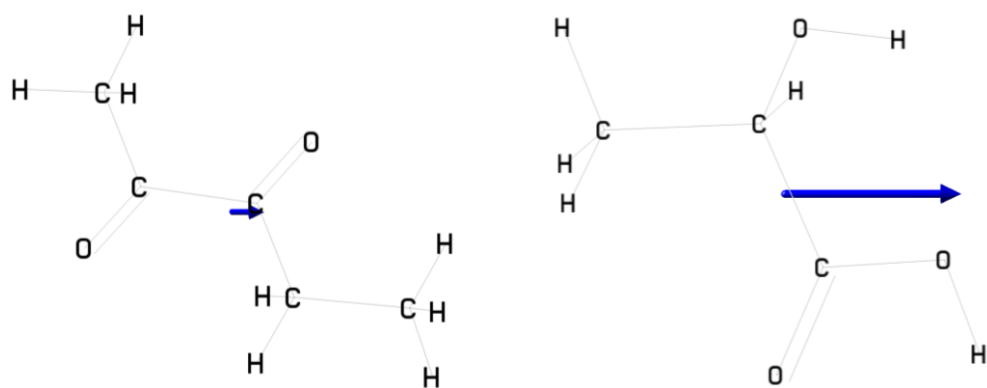

dipole moment: 0.1407(Debye)

1.7216(Debye)

molecular volume (V): 136.41044 Angstrom<sup>3</sup>

107.53266 Angstrom<sup>3</sup>

**Figure S6** Results on dipole moments of 2,3-pentanedione and lactic acid calculated with Gaussian by b3lyp/6-31g(d)

\*: Based on equation  $V = \frac{4}{3} \pi R^3$ ,  $D = 2R$ , we can obtain the diameter (D).

## References

1. B. Yan, L. Z. Tao, Y. Liang and B. Q. Xu, *ACS Catal.*, 2014, **4**, 1931-1943.
2. X. L. Li, Y. Zhang, Z. Chen, P. Can, W. X. Zou, C. M. Tang, L. Dong and Y. Wang, *Ind. Eng. Chem. Res.*, 2017, **56**, 14437-14446.
